# Supplementary material for: A Small-Volume, Low-Cost, and Versatile Continuous Culture Device
Source: PubMed Central journal article supplement (PMC4510131; doi:10.1371/journal.pone.0133384), 2015-07-21
Supplement: pone.0133384.s001.pdf [file pone.0133384.s001.pdf]

# FR-A1

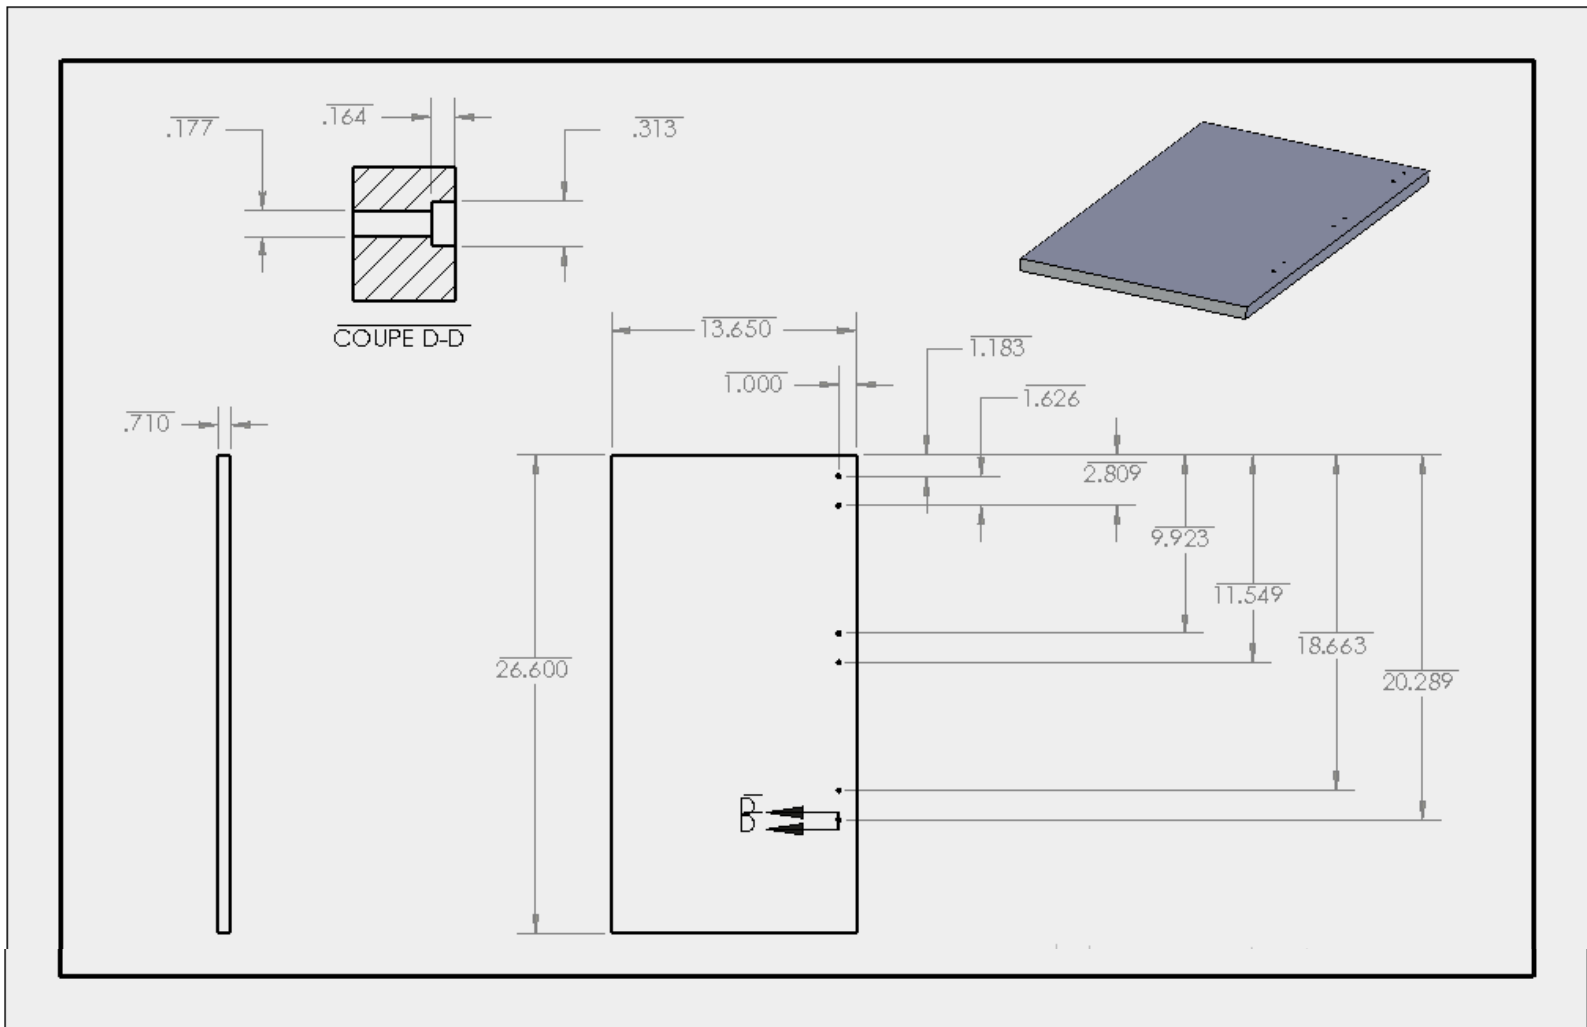

FR-B1

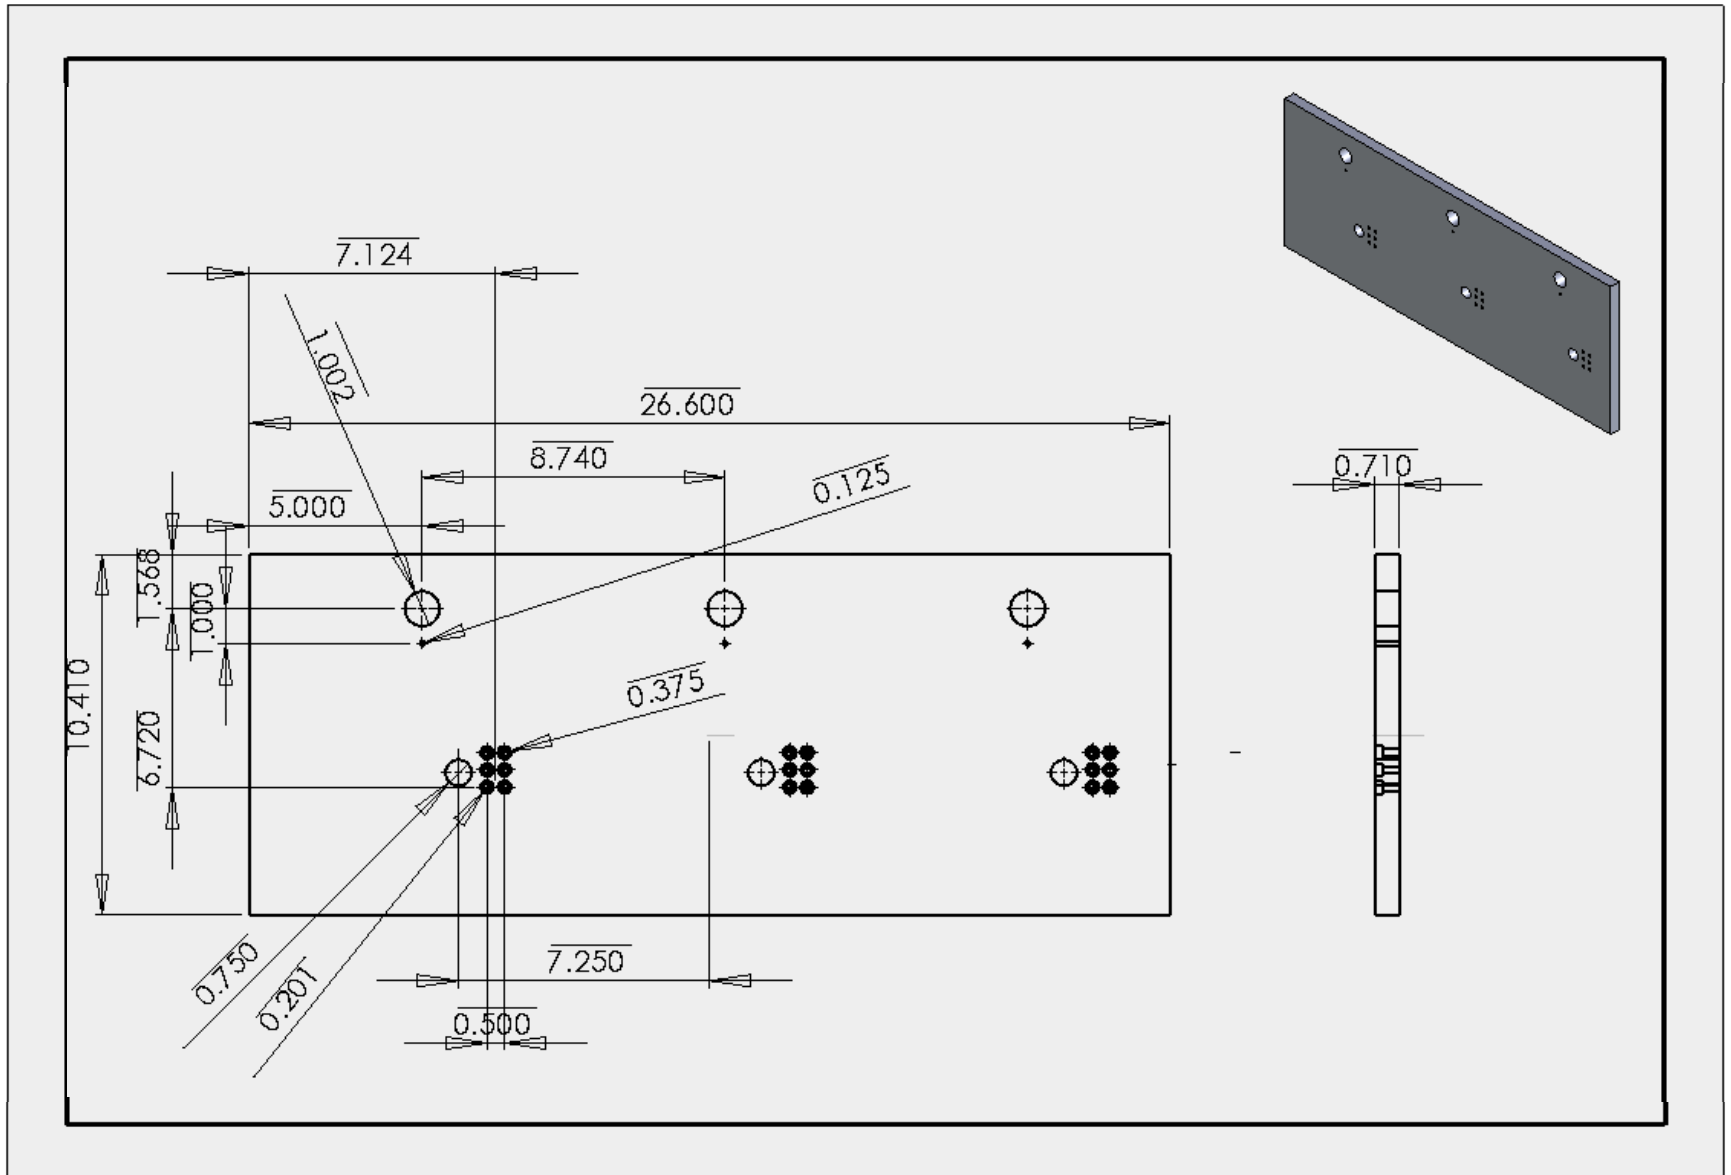

FR-C1

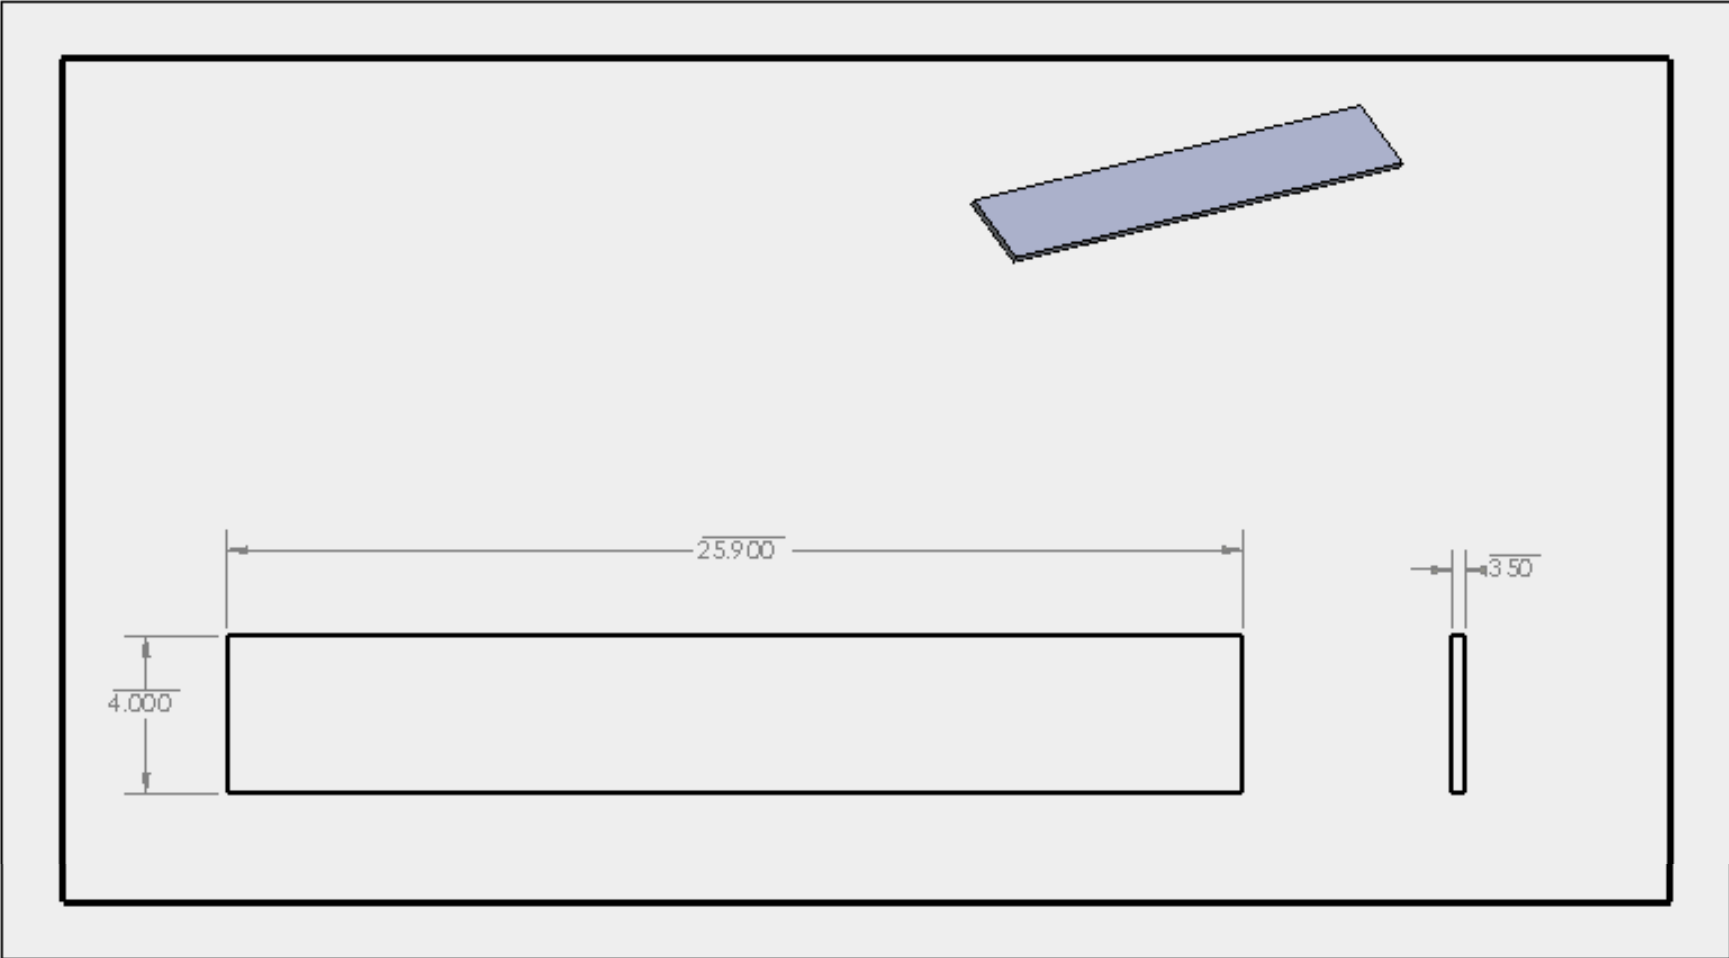

FR-D1; D2

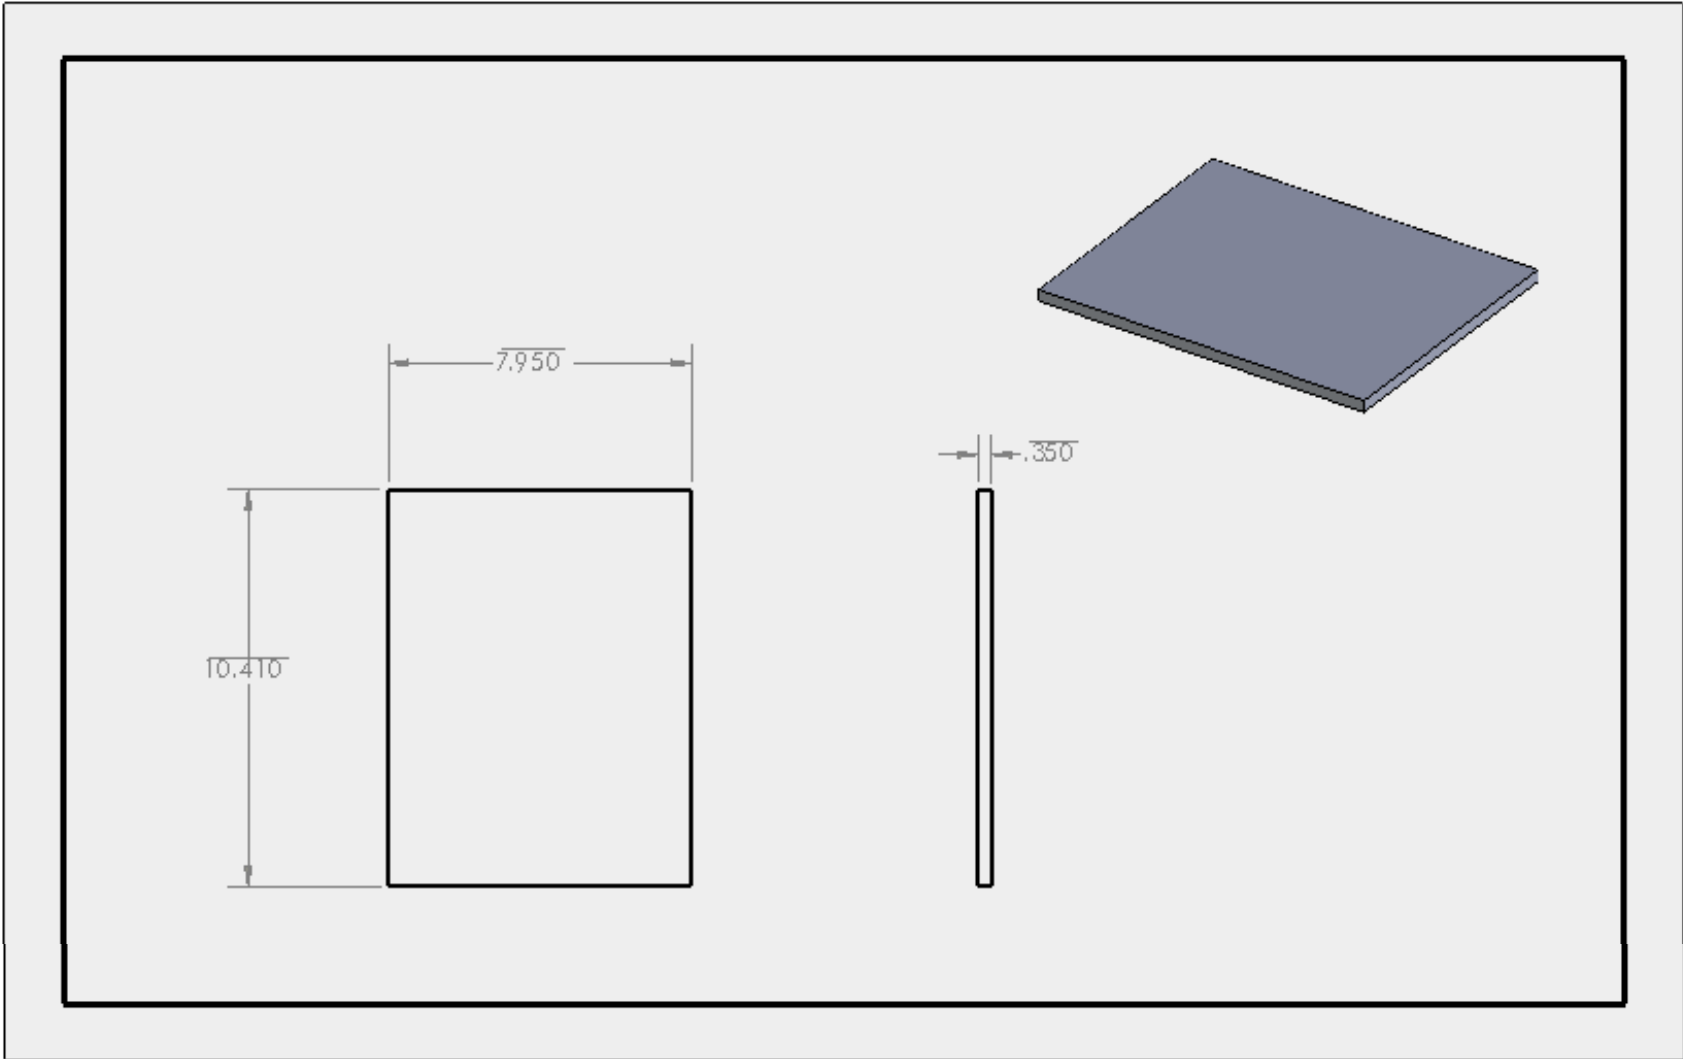

FR-E1

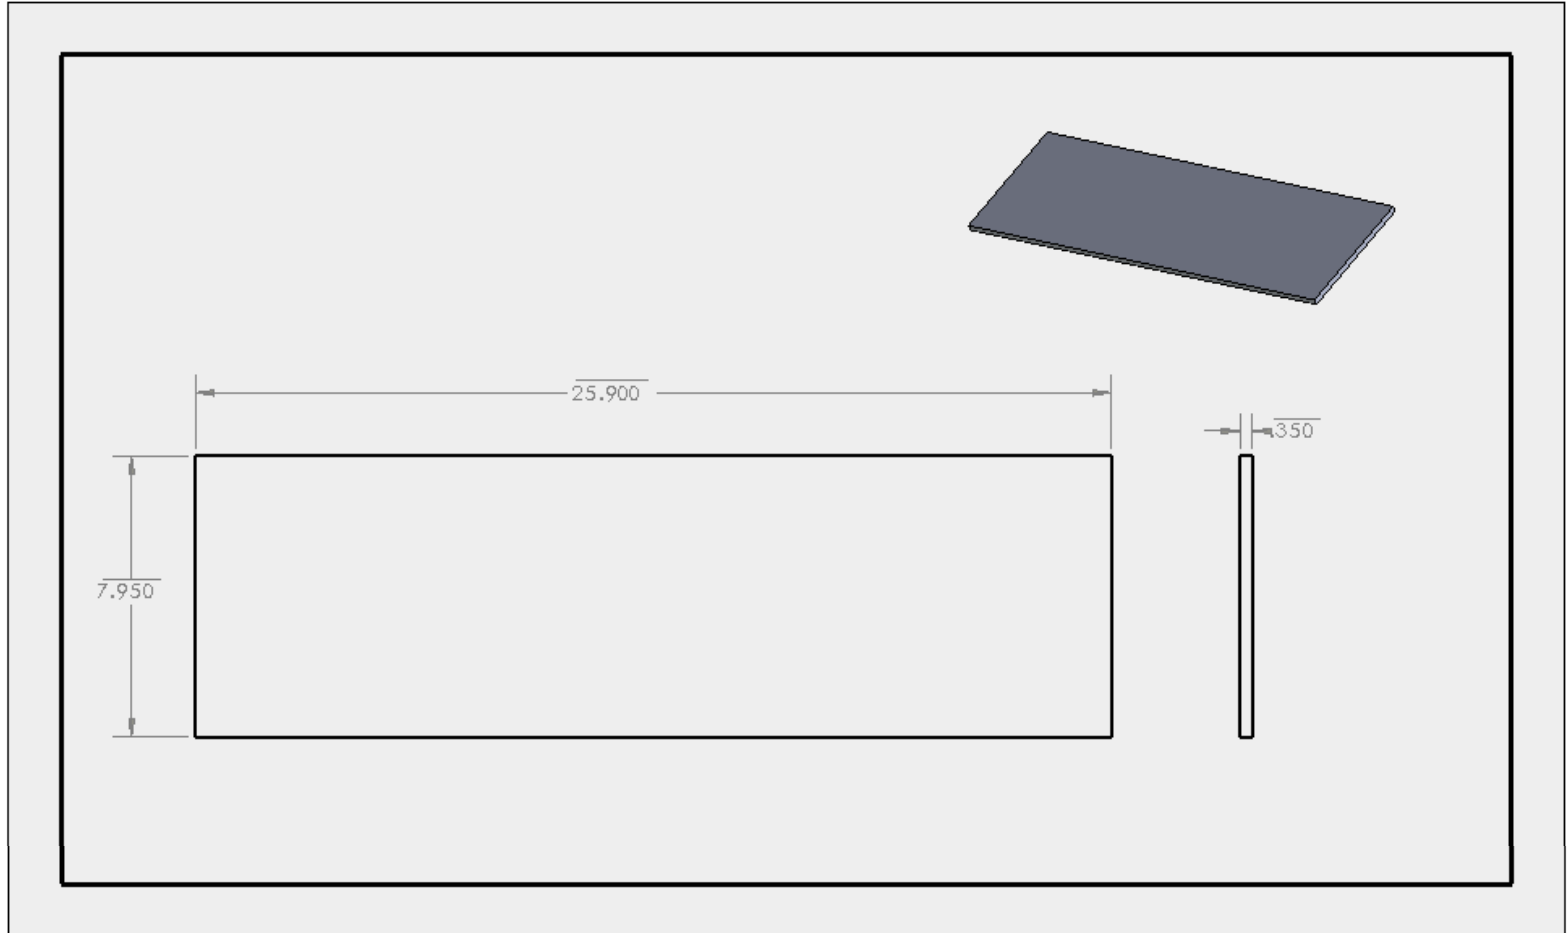

FR-F1

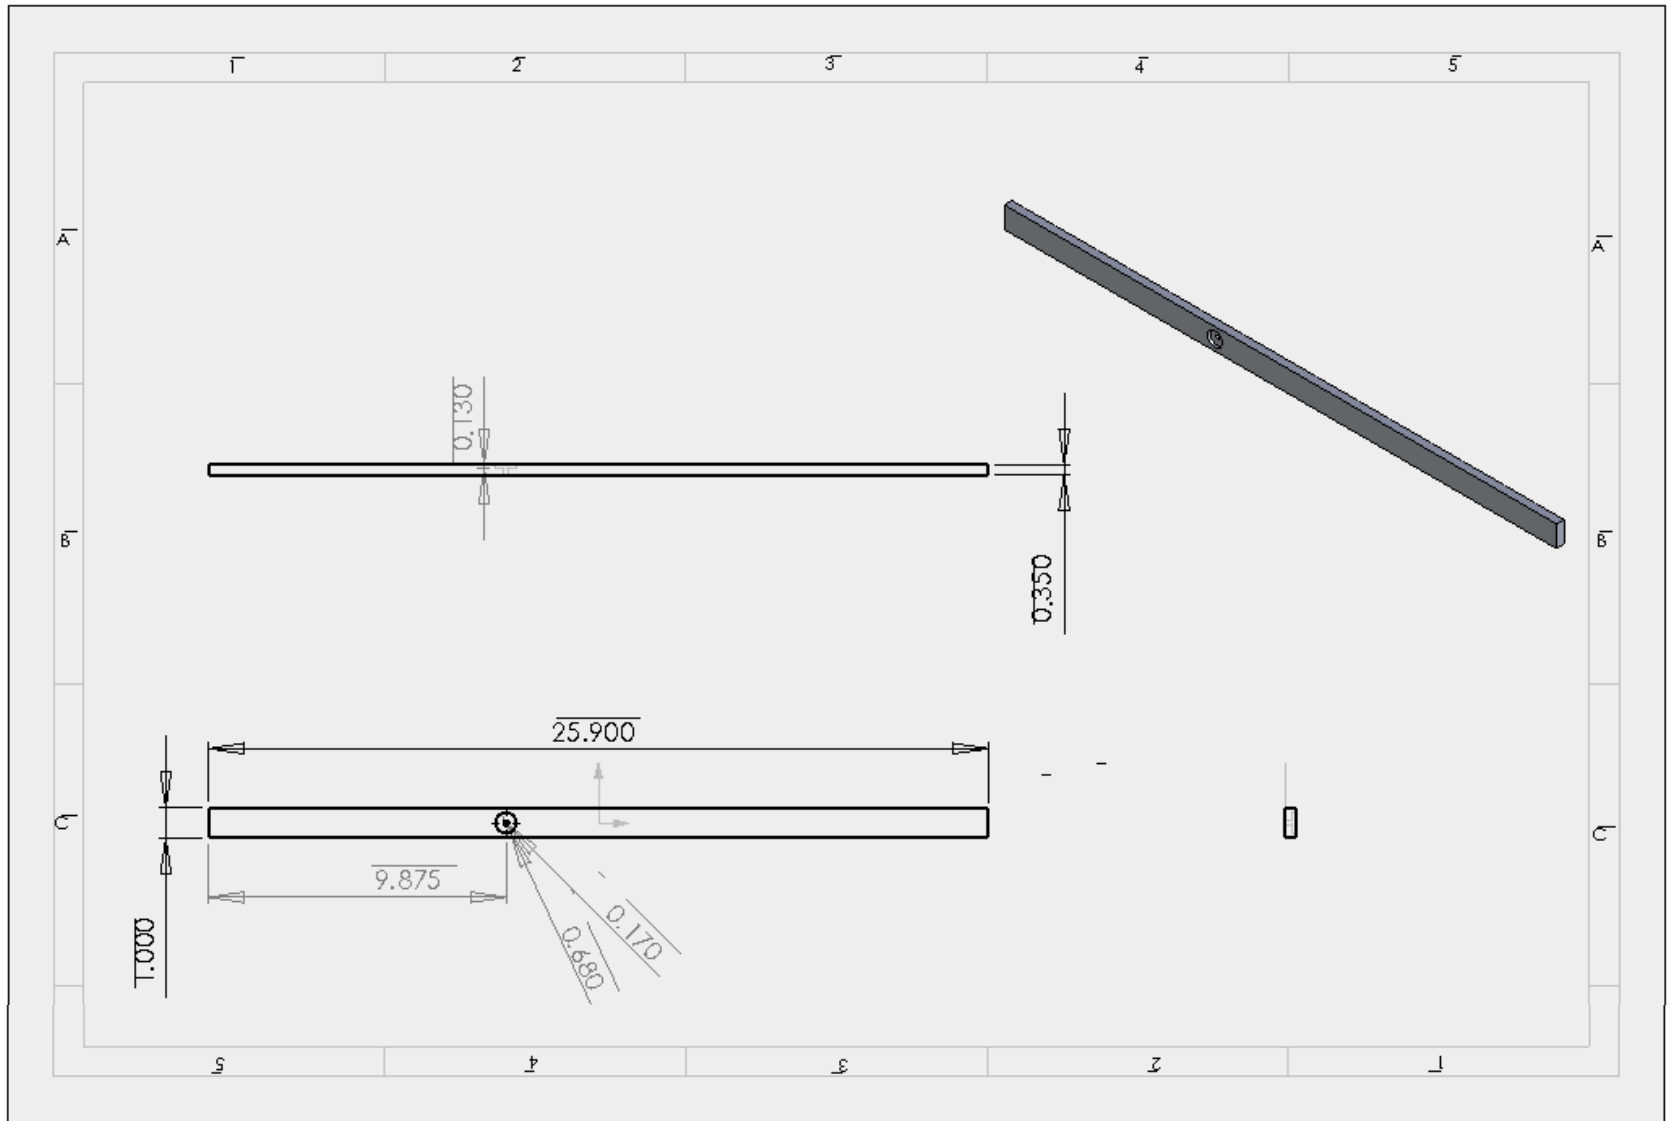

FR-G1; G2; G3

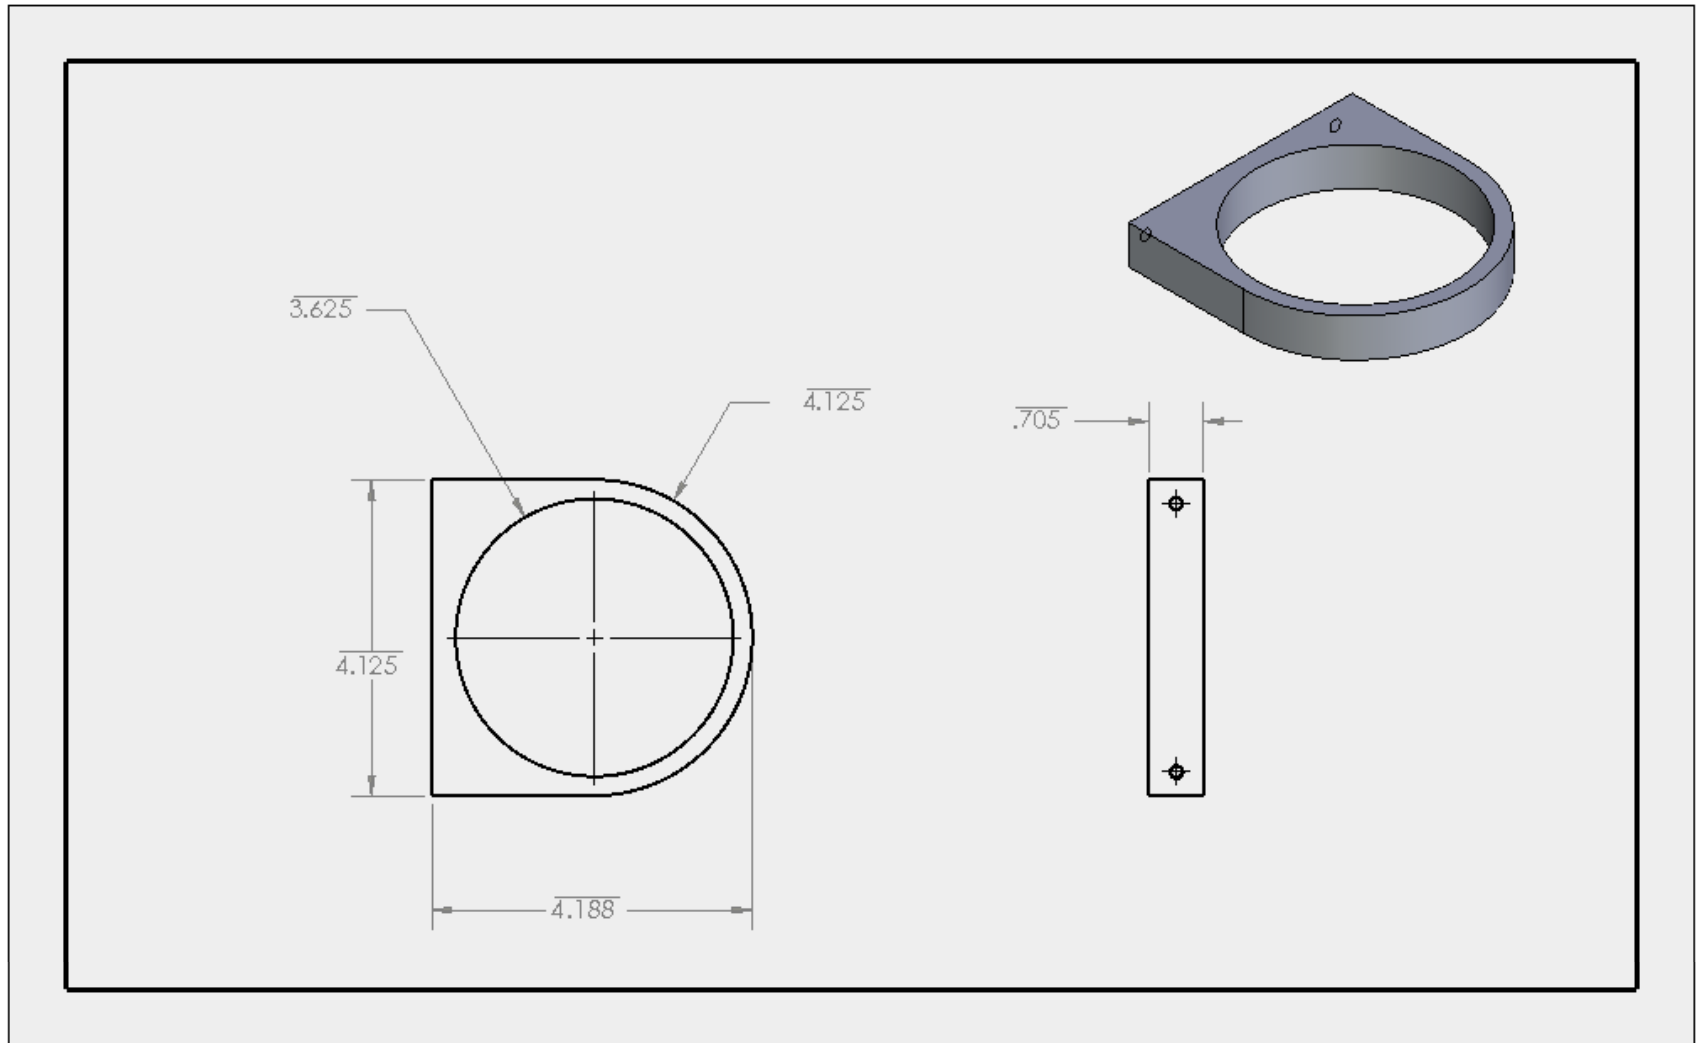

FR-H1; H2; H3

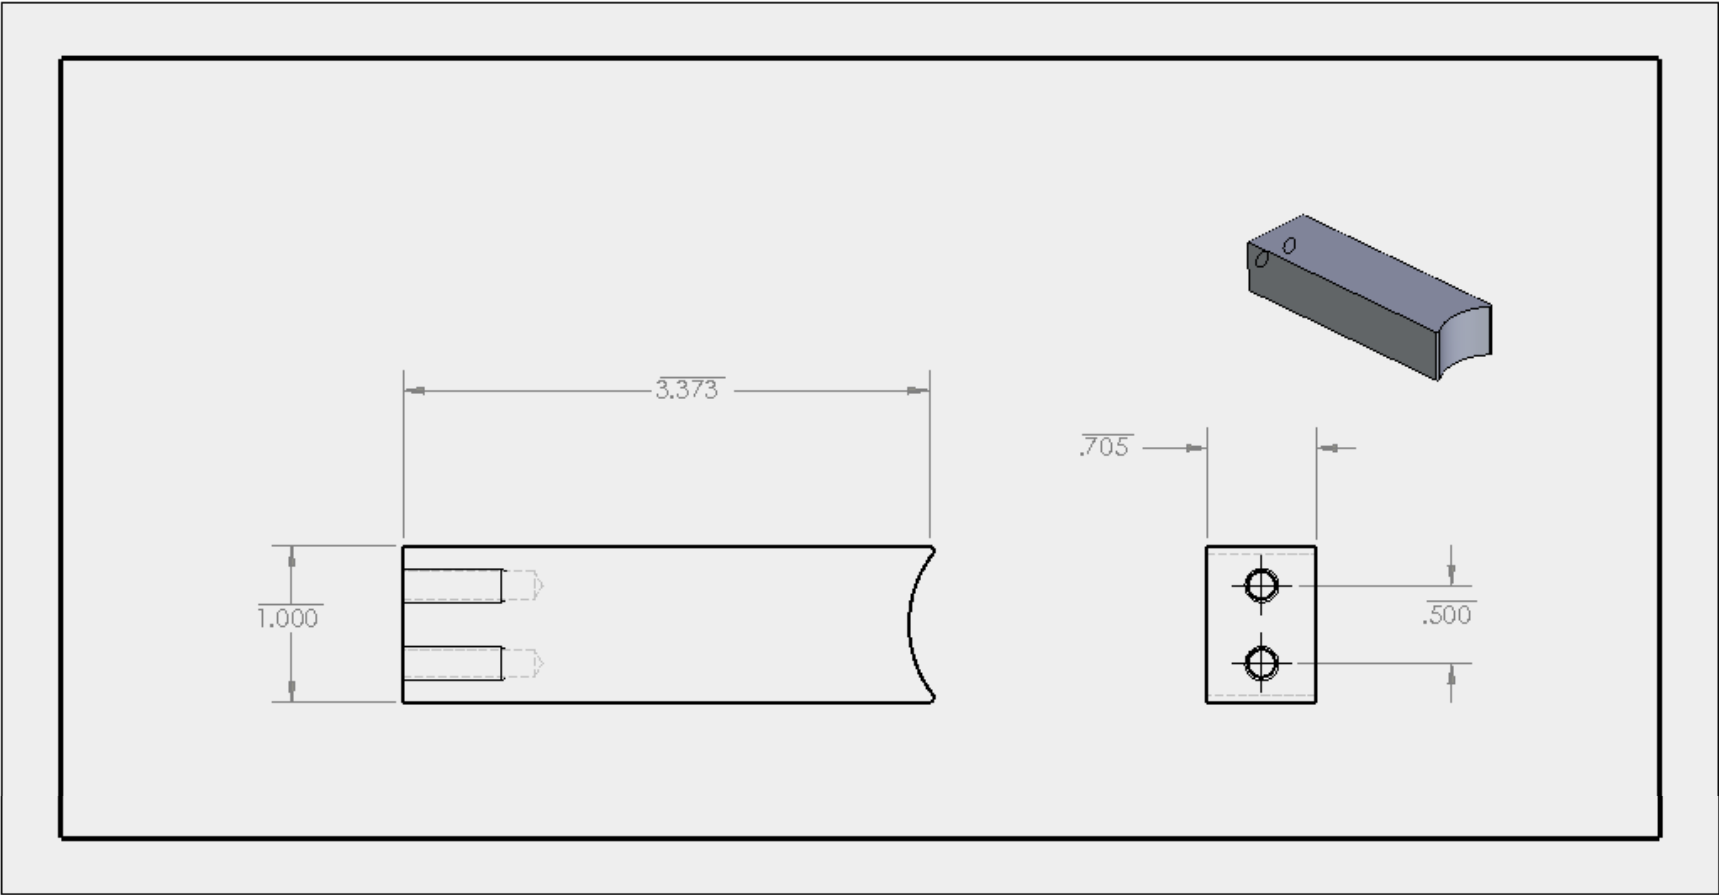



FR-I1; I2; I3

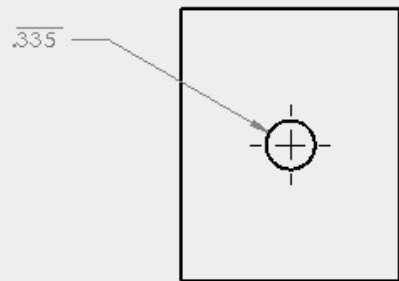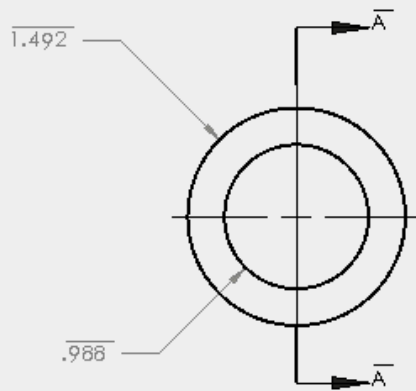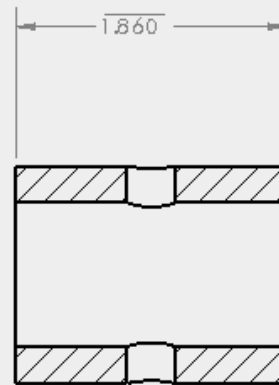

COUPE A-A

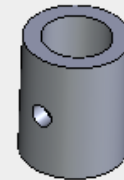

FR-J1; J2; J3

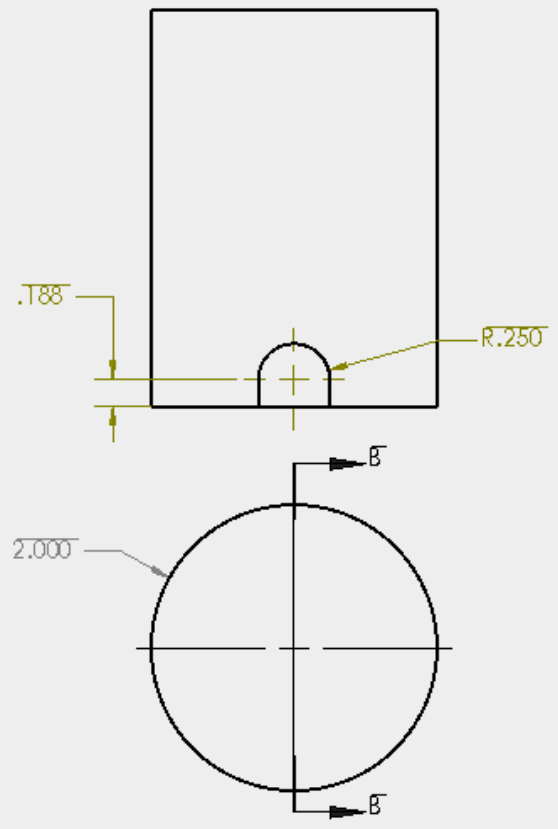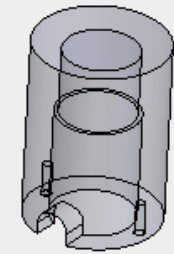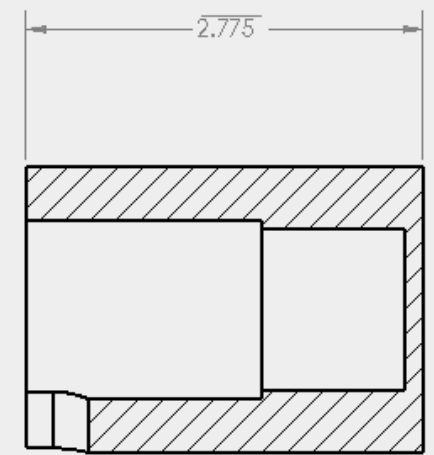

COUPE B-B  
ECHELLE 1 : 1

FR-L1; L2; L3

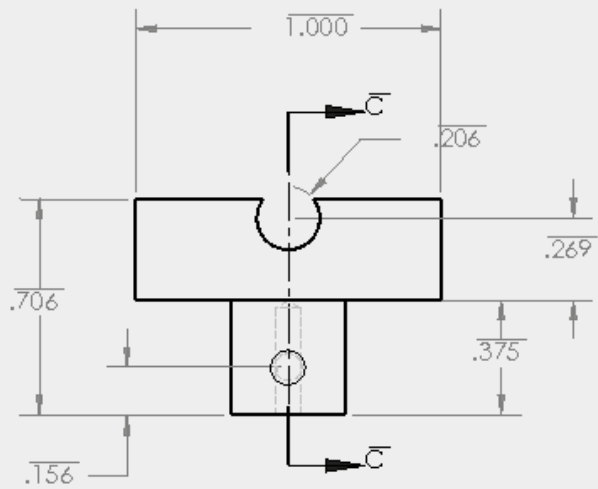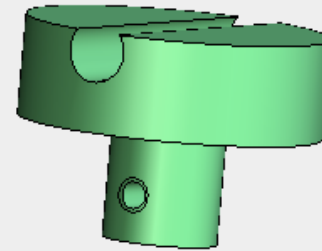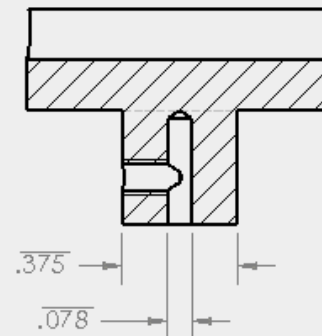

COUPE C-C  
ECHELLE 2:1
