# Supplementary material for: A Small-Volume, Low-Cost, and Versatile Continuous Culture Device
Source: PubMed Central journal article supplement (PMC4510131; doi:10.1371/journal.pone.0133384), 2015-07-21

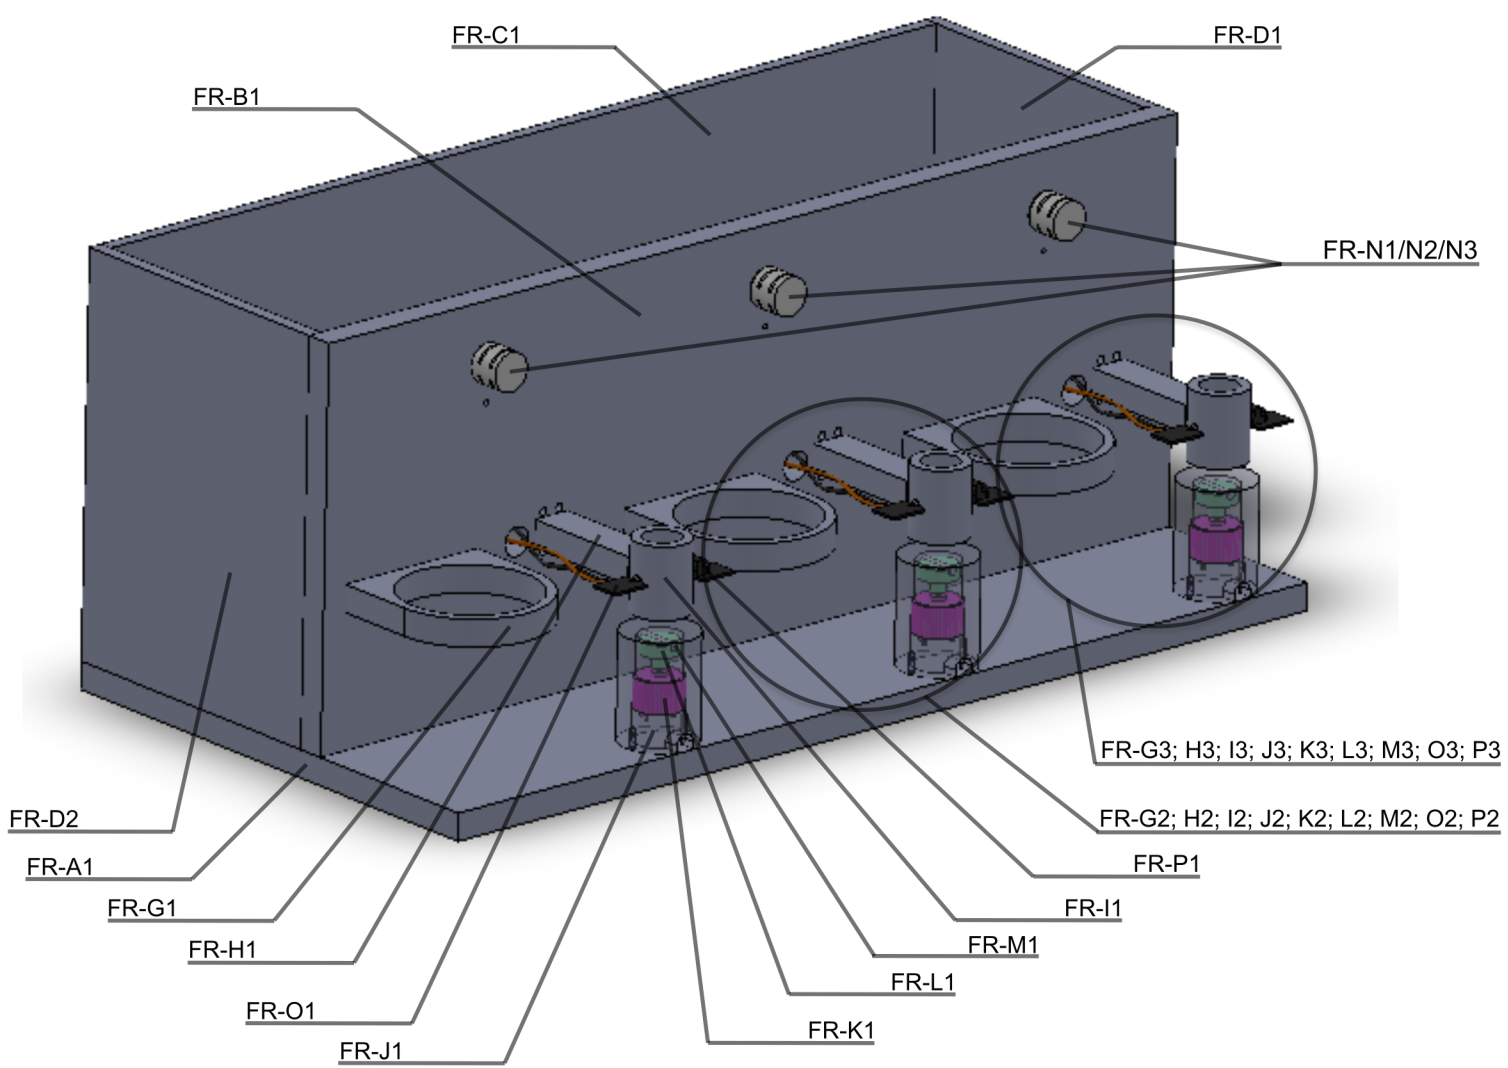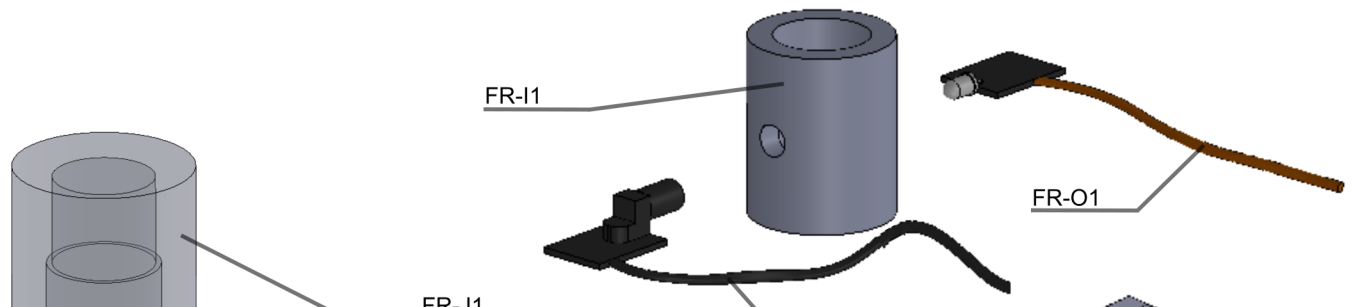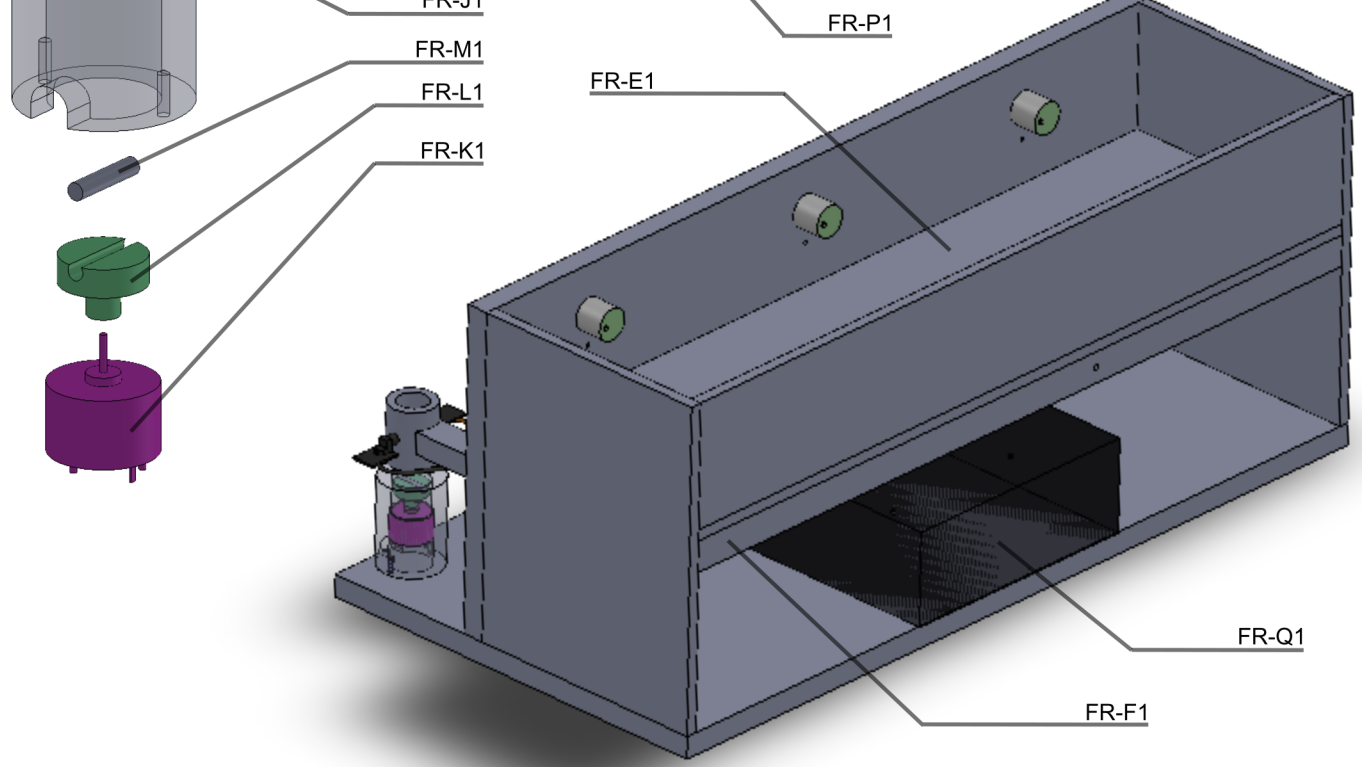

Supplement: pone.0133384.s002.pdf [file pone.0133384.s002.pdf]
