# Supplementary material for: A Small-Volume, Low-Cost, and Versatile Continuous Culture Device
Source: PubMed Central journal article supplement (PMC4510131; doi:10.1371/journal.pone.0133384), 2015-07-21

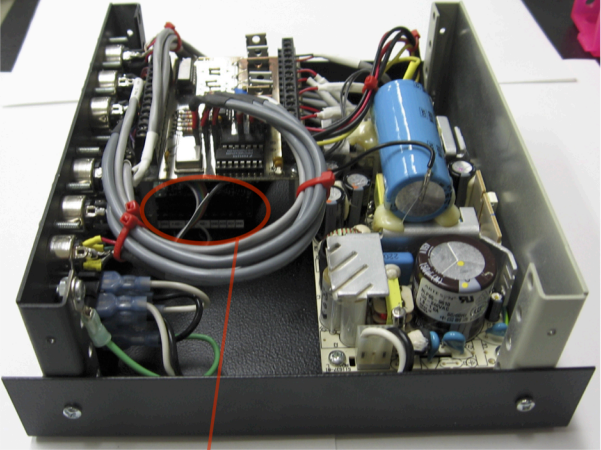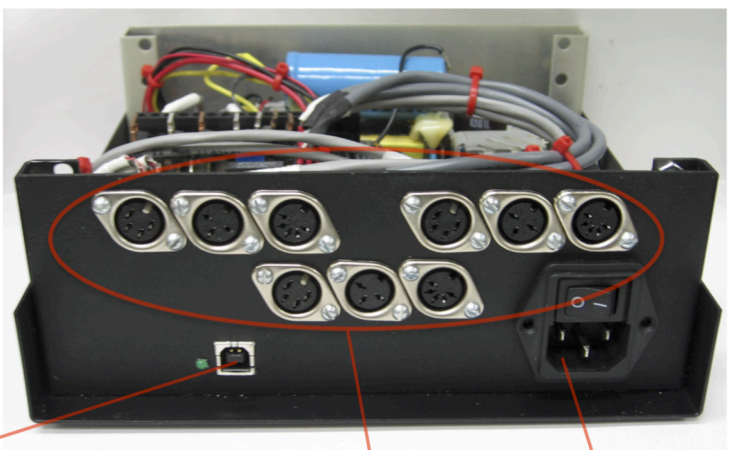

EL-C1

EL-D1

EL-E1/E2/E3; F1/F2/F3; G1/G2/G3

EL-H1

EL-B1

EL-A1

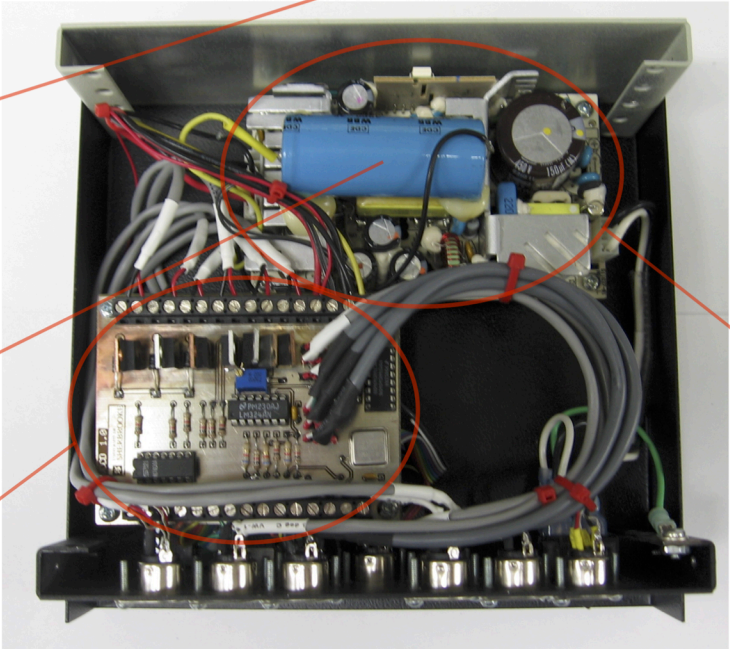

Supplement: pone.0133384.s004.pdf [file pone.0133384.s004.pdf]
