# Supplementary material for: A Small-Volume, Low-Cost, and Versatile Continuous Culture Device
Source: PubMed Central journal article supplement (PMC4510131; doi:10.1371/journal.pone.0133384), 2015-07-21

A

## Photo emitter

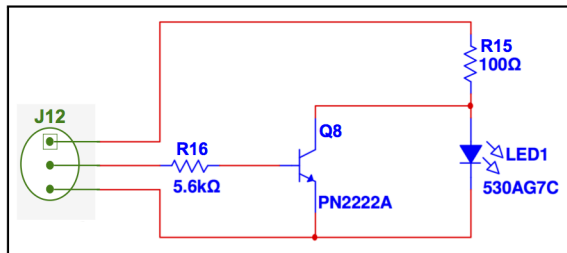

## Mixer &amp; pinch valve

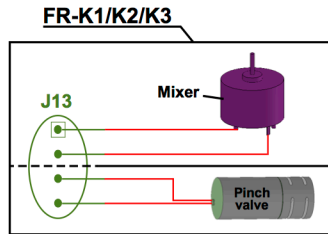

## Photo receiver

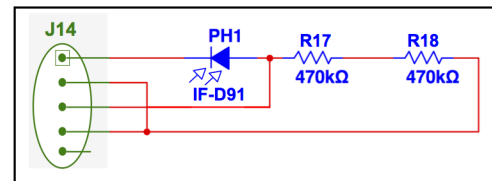

B

## Photo emitter connector

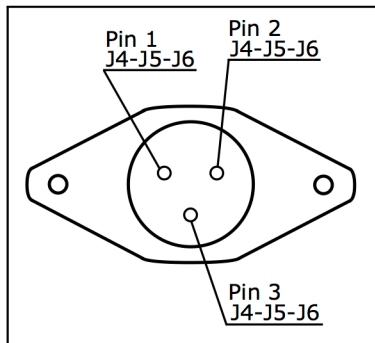

## Mixer &amp; pinch valve connector

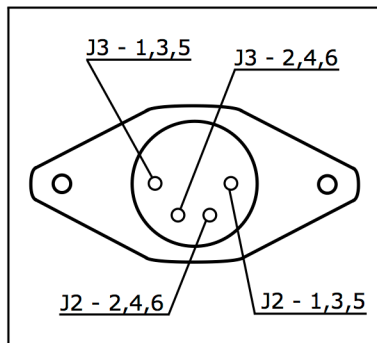

## Photo receiver connector

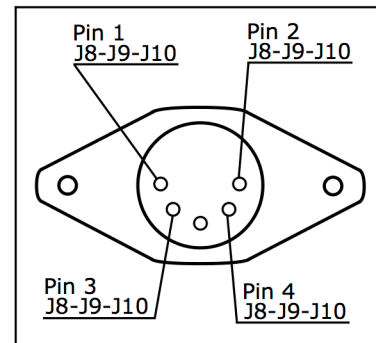

Supplement: pone.0133384.s007.pdf [file pone.0133384.s007.pdf]
