# Supplementary material for: A Small-Volume, Low-Cost, and Versatile Continuous Culture Device
Source: PubMed Central journal article supplement (PMC4510131; doi:10.1371/journal.pone.0133384), 2015-07-21

### Main board 3D representation

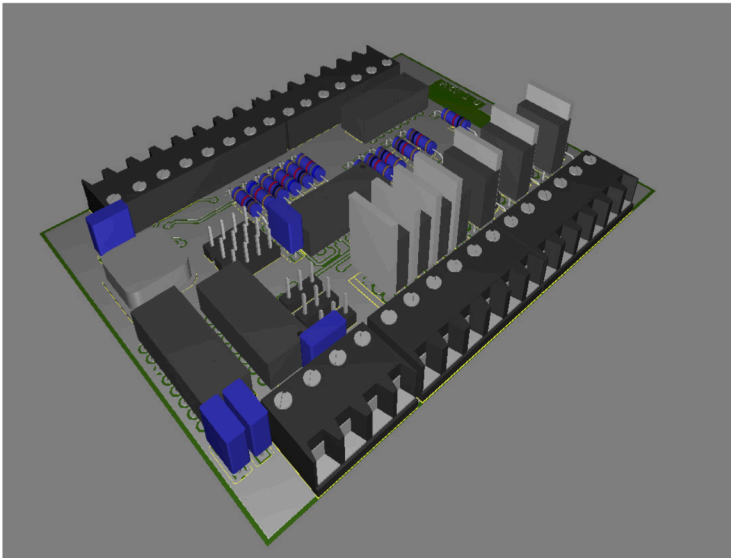

### Main board silkscreen

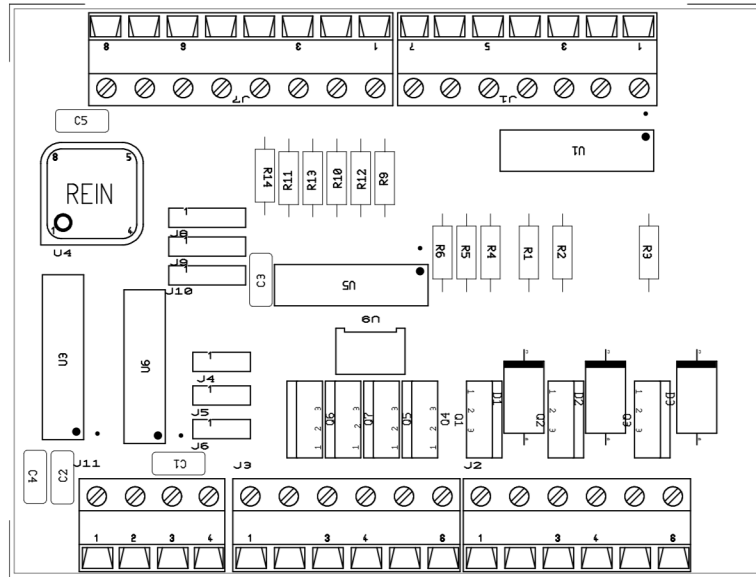

### Main board solder side

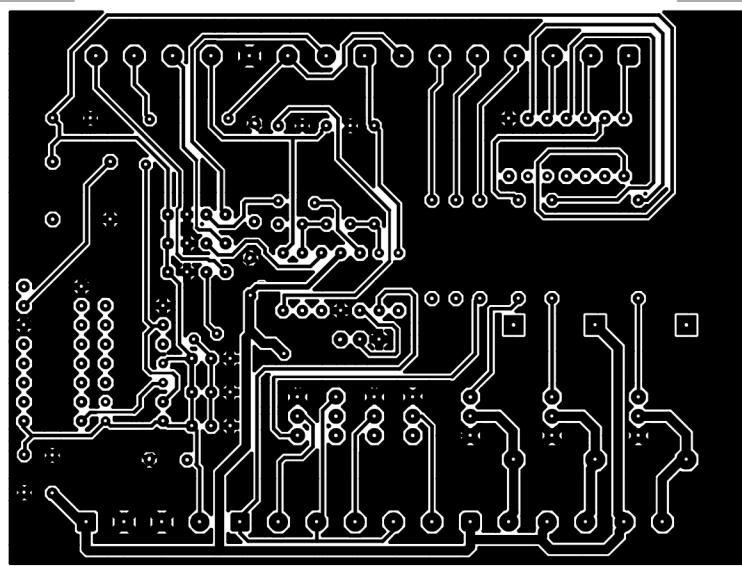

### Main board component side

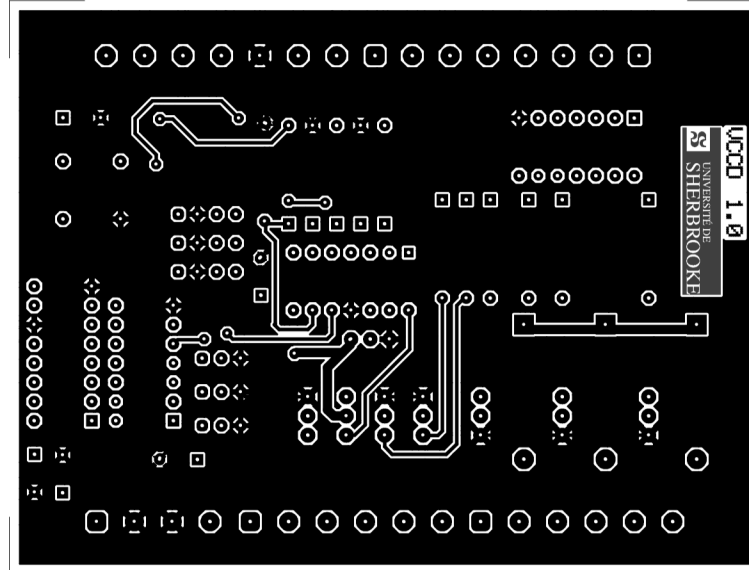

Supplement: pone.0133384.s008.pdf [file pone.0133384.s008.pdf]
