# Supplementary material for: A Small-Volume, Low-Cost, and Versatile Continuous Culture Device
Source: PLoS One. 2015 Jul 21;10(7):e0133384. doi: 10.1371/journal.pone.0133384 (PMC4510131; doi:10.1371/journal.pone.0133384)
Supplement: S2 Table — Contains detailed description for each part belonging to the VCCD culture system, as well as their reference code on S2 Fig. (XLSX) [file pone.0133384.s017.xlsx]

## Sheet: Feuil1
	Product description	Source	Approx. price (USD)	Order/Part number	required number or amount per system	Approx. price per system (USD)	Reference code in S2 Fig.
	3W 120V/60Hz aquarium pump, 1.5L/min, single output	SunSun/Perfect	6.99 each	YT-301C	3	20.97	CS-A1
	Platinum-Cured Silicone Tubing, 1/8"ID x 1/4"OD, 25 ft/pack, autoclavable	Cole-Parmer	42.00 / Pack	RK-95802-05	3X 1.5''	0.63	CS-B1
	PVDF barbed Y connector, 1/16" ID, 1/32", 1/2", 3/8"; Pack of 10, autoclavable	Cole-Parmer	21.50 / Pack	EW-30703-90	3	6.45	CS-J1
	Barbed fittings, Reducing Connector, Kynar, 3/16" x 1/16" ID, 1/32", 1-1/16", 3/8"; 10/pack, autoclavable	Cole-Parmer	20.00 / Pack	EW-30703-46	12	24.00	CS-C1/C2/C3/C4
	PTFE Tubing, 1/16"ID x 1/8"OD, 25 ft/pack, autoclavable	Cole-Parmer	24.00 / Pack	EW-06411-62	3X (24'', 13'', 8'', 18'', 15'', 22'', 18'', 10''), 6X 7.5'', 3X 3''	35.04	CS-D1 (24''); D2 (13''); D3/D7 (7.5''); D4 (8''); D5 (18''); D6 (15'') ; D8 (22''); D9 (18''); D10 (3''); D11 (10'')
	Peroxide-Cured Silicone Tubing, 1/4"ID x 3/8"OD, 25 ft/pack, autoclavable	Cole-Parmer	56.00 / Pack	RK-06411-71	9X 3'', 3X 6''	8.40	CS-E1/E2/E3 (3''); E4 (6'')
	Acro 50 0.2 µm filter, hose barb with PTFE Membrane, 50 mm filter, autoclavable, pack of 18	VWR	241.67 / Pack	4251	6	80.56	CS-F1/F2
	500 ml Storage/Media Bottles, KG-35 Borosilicate Glass, Screw Thread, with Black Polypropylene Closure Welded to PTFE/Silicone Liner, pack of 24	Kimble Chase	208.12 / Pack	61110P-500	9	78.05	CS-H1/H2/H3
	PYREX 55mL Screw Cap Culture Tubes with Phenolic Caps, 25x150mm, pack of 48	Corning	430.30 / Pack	9825-25	3	26.89	CS-L1
	PTFE Tubing, 1/16"ID x 1/8"OD, 25 ft/pack, autoclavable	Cole-Parmer	40.00 / Pack	OF-06605-27	24X 2'', 3X 4.25''	8.10	CS-I1/I2/I3/I4/I5/I6/I7/I8 (2''); I9 (4.25'')
	Fluorocarbon O-Rings, 75 Duro, 11/16'' I.D, 3/32 width, -20° to +400°F, autoclavable	Hercules Sealing Products	0.74 each	568-115V	3	2.22	CS-K1
	Fluorocarbon O-Rings, 75 Duro, 1'' I.D, 3/32 width, -20° to +400°F, autoclavable	Hercules Sealing Products	0.98 each	568-120V	9	8.82	CS-G1/G2/G3
	VWR Spinbar Stir Bars, Octagon, 5/16 x 1/2", pack of 6	VWR	49.85 / Pack	58949-036	3	24.93	CS-M1
