# Supplementary material for: A Small-Volume, Low-Cost, and Versatile Continuous Culture Device
Source: PLOS journal article supplement (doi:10.1371/journal.pone.0133384), 2015-07-21

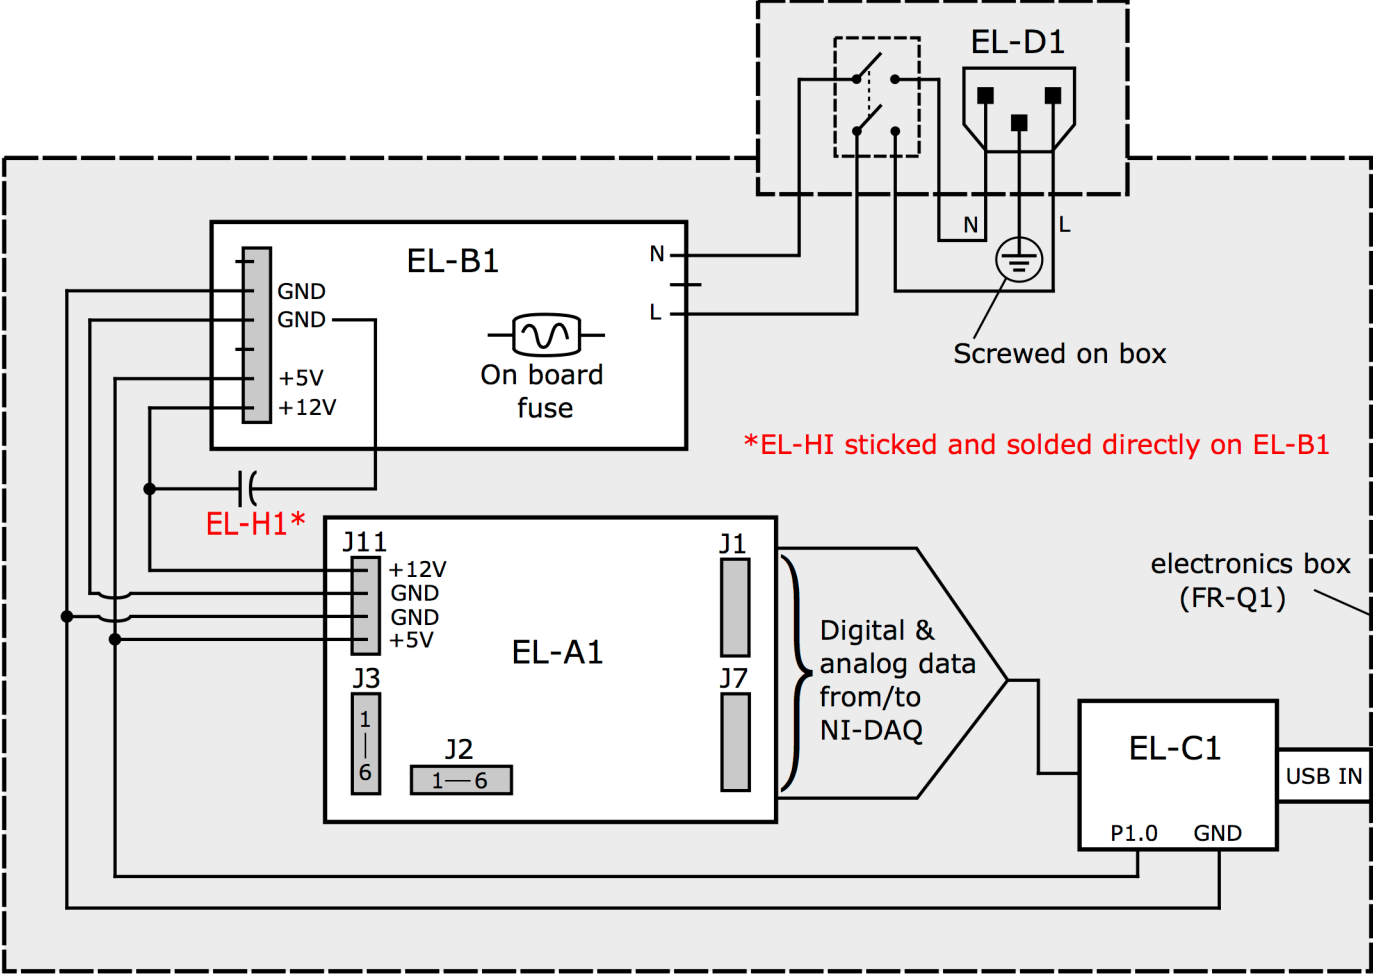

Supplement: S5 (10.1371/journal.pone.0133384.s005) [file journal.pone.0133384.s005]
